# Supplementary material for: Late Survival Benefit of Percutaneous Coronary Intervention Compared With Medical Therapy in Patients With Coronary Chronic Total Occlusion: A 10‐Year Follow‐Up Study
Source: PubMed Central journal article supplement — J Am Heart Assoc. 2021 Mar 4;10(6):e019022. doi: 10.1161/JAHA.120.019022 (PMC8174228; doi:10.1161/jaha.120.019022), 2021-03-04
Supplement: JAH3-10-e019022-s001.pdf [file JAH3-10-e019022-s001.pdf]

# **SUPPLEMENTAL MATERIAL**

**Table S1. Baseline Characteristics in the OMT, Failed CTO-PCI, and Successful CTO-PCI Groups.**

|                                        | OMT<br>(n = 664) | Failed CTO-PCI<br>(n = 184) | Successful CTO-PCI<br>(n = 699) | <i>p</i> Value |
|----------------------------------------|------------------|-----------------------------|---------------------------------|----------------|
| Age, years                             | 65.9 ± 11.3      | 63.1 ± 9.6                  | 61.1 ± 11.1                     | <0.001         |
| Men                                    | 509 (76.7)       | 150 (81.5)                  | 563 (80.5)                      | 0.14           |
| Diabetes mellitus                      | 318 (47.9)       | 81 (44.0)                   | 303 (43.3)                      | 0.22           |
| Hypertension                           | 439 (66.1)       | 124 (67.4)                  | 423 (60.5)                      | 0.05           |
| Dyslipidemia                           | 158 (23.8)       | 51 (27.7)                   | 238 (34.0)                      | <0.001         |
| Current smoker                         | 182 (27.4)       | 57 (31.0)                   | 228 (32.6)                      | 0.11           |
| Renal failure                          | 61 (9.2)         | 16 (8.7)                    | 52 (7.4)                        | 0.50           |
| Family History of CAD                  | 73 (11.0)        | 17 (9.2)                    | 118 (16.9)                      | 0.001          |
| Previous MI                            | 211 (31.8)       | 44 (23.9)                   | 136 (19.5)                      | <0.001         |
| Previous PCI                           | 208 (31.3)       | 50 (27.2)                   | 128 (18.3)                      | <0.001         |
| Previous stroke                        | 67 (10.1)        | 17 (9.2)                    | 49 (7.0)                        | 0.12           |
| Peripheral artery disease              | 40 (6.0)         | 5 (2.7)                     | 18 (2.6)                        | 0.003          |
| Left ventricular ejection fraction, %* | 53.4 ± 13.7      | 58.1 ± 13.1                 | 57.9 ± 11.7                     | <0.001         |

|                               |            |            |            |        |
|-------------------------------|------------|------------|------------|--------|
| Acute coronary syndrome       | 98 (14.8)  | 40 (21.7)  | 175 (25.0) | <0.001 |
| Multivessel disease           | 517 (77.9) | 139 (75.5) | 456 (65.2) | <0.001 |
| CTO vessel                    |            |            |            |        |
| Left anterior descending      | 168 (25.3) | 60 (32.6)  | 313 (44.8) | <0.001 |
| Left circumflex               | 228 (34.3) | 59 (32.1)  | 202 (28.9) | 0.10   |
| Right coronary                | 370 (55.7) | 91 (49.5)  | 292 (41.8) | <0.001 |
| Multi-CTO                     | 94 (14.2)  | 24 (13.0)  | 106 (15.2) | 0.73   |
| Blunt stump                   | 335 (50.5) | 90 (48.9)  | 295 (42.2) | 0.008  |
| Bridging collateral           | 236 (35.5) | 63 (34.2)  | 202 (28.9) | 0.03   |
| Calcification                 | 116 (17.5) | 36 (19.6)  | 104 (14.9) | 0.22   |
| Collateral flow               |            |            |            | 0.72   |
| 0                             | 21 (3.2)   | 4 (2.2)    | 15 (2.1)   |        |
| 1                             | 138 (20.8) | 40 (21.7)  | 128 (18.3) |        |
| 2                             | 269 (40.5) | 74 (40.2)  | 290 (41.5) |        |
| 3                             | 236 (35.5) | 66 (35.9)  | 266 (38.1) |        |
| Proximal or mid, CTO location | 424 (63.9) | 134 (72.8) | 509 (72.8) | 0.001  |

|                                   |            |            |            |        |
|-----------------------------------|------------|------------|------------|--------|
| SYNTAX score                      | 19.8 ± 9.7 | 19.8 ± 8.2 | 19.6 ± 8.9 | 0.87   |
| Medication                        |            |            |            |        |
| Aspirin                           | 560 (84.3) | 173 (94.0) | 645 (92.3) | <0.001 |
| Clopidogrel                       | 405 (61.0) | 134 (72.8) | 670 (95.9) | <0.001 |
| Statin                            | 446 (67.2) | 126 (68.5) | 519 (74.2) | 0.01   |
| β-blocker                         | 368 (55.4) | 113 (61.4) | 392 (56.1) | 0.33   |
| Renin-angiotensin system blockade | 413 (62.2) | 103 (56.0) | 417 (59.7) | 0.28   |

---

Data are presented as mean ± average or number of patients (%).

CAD indicates coronary artery disease; CTO, chronic total occlusion; MI, myocardial infarction; OMT, optimal medical therapy; PCI, percutaneous coronary intervention; and SYNTAX, Synergy Between Percutaneous Coronary Intervention With Taxus and Cardiac Surgery.

\*Left ventricular ejection fraction was available in in 593 patients in the OMT group, 159 patients in the failed CTO-PCI group, and 614 patients in the successful CTO-PCI group.

**Table S2. Clinical Outcomes at 10-year according to the Procedural Success or Failure.**

|                             | Successful | Failed    | Univariable analysis |                | Multivariable-adjusted |                |
|-----------------------------|------------|-----------|----------------------|----------------|------------------------|----------------|
|                             | CTO-PCI    | CTO-PCI   | Hazard ratio         | <i>p</i> value | Hazard ratio           | <i>p</i> value |
|                             | (n = 699)  | (n = 184) | (95% CI)             |                | (95% CI)               |                |
| Cardiac death               | 46 (8.5)   | 27 (18.1) | 0.39 (0.24-0.63)     | <0.001         | 0.40 (0.24-0.64)       | <0.001         |
| All-cause death             | 111 (18.2) | 44 (27.9) | 0.58 (0.41-0.83)     | 0.003          | 0.59 (0.41-0.84)       | 0.004          |
| Acute myocardial infarction | 38 (6.2)   | 7 (4.4)   | 1.32 (0.59-2.95)     | 0.51           | 1.49 (0.64-3.45)       | 0.35           |
| PCI at any lesions          | 137 (23.9) | 26 (18.2) | 1.26 (0.83-1.92)     | 0.28           | 1.38 (0.91-2.11)       | 0.13           |
| CABG                        | 15 (2.9)   | 7 (4.6)   | 0.49 (0.20-1.19)     | 0.11           | 0.48 (0.20-1.19)       | 0.11           |
| Any revascularization       | 148 (26.2) | 30 (20.7) | 1.17 (0.79-1.73)     | 0.45           | 1.24 (0.84-1.85)       | 0.28           |

Percentages are presented as Kaplan-Meier estimates. Hazard ratios are for successful CTO-PCI group relative to failed CTO-PCI group. The Multivariable models for each endpoint were determined using backward stepwise elimination procedures where the least significant variable was removed one at a time from the full model including variables from Table S1. CABG indicates coronary artery bypass graft; CI, confidence interval; CTO, chronic total occlusion; OMT, optimal medical therapy; and PCI, percutaneous coronary intervention.

**Table S3. Clinical Outcomes at 10-year in the OMT and Failed CTO-PCI Groups.**

|                             | OMT<br>(n = 664) | Failed<br>CTO-PCI<br>(n = 184) | Univariable analysis     |                | Multivariable-adjusted   |                |
|-----------------------------|------------------|--------------------------------|--------------------------|----------------|--------------------------|----------------|
|                             |                  |                                | Hazard ratio<br>(95% CI) | <i>p</i> value | Hazard ratio<br>(95% CI) | <i>p</i> value |
| Cardiac death               | 106 (22.3)       | 27 (18.1)                      | 0.86 (0.56-1.31)         | 0.49           | 1.12 (0.73-1.73)         | 0.60           |
| All-cause death             | 226 (40.4)       | 44 (27.9)                      | 0.66 (0.48-0.91)         | 0.01           | 0.85 (0.61-1.18)         | 0.33           |
| Acute myocardial infarction | 57 (12.0)        | 7 (4.4)                        | 0.41 (0.19-0.90)         | 0.03           | 0.52 (0.24-1.16)         | 0.11           |
| PCI at any lesions          | 108 (23.2)       | 26 (18.2)                      | 0.78 (0.51-1.20)         | 0.26           | 0.83 (0.54-1.29)         | 0.41           |
| CABG                        | 52 (11.6)        | 7 (4.6)                        | 0.44 (0.20-0.97)         | 0.04           | 0.41 (0.18-0.90)         | 0.03           |
| Any revascularization       | 152 (32.7)       | 30 (20.7)                      | 0.62 (0.42-0.91)         | 0.02           | 0.62 (0.42-0.93)         | 0.02           |

Percentages are presented as Kaplan-Meier estimates. Hazard ratios are for failed CTO-PCI group relative to OMT group. The Multivariable models for each endpoint were determined using backward stepwise elimination procedures where the least significant variable was removed one at a time from the full model including variables from Table S1. CABG indicates coronary artery bypass graft; CI, confidence interval; CTO, chronic total occlusion; OMT, optimal medical therapy; and PCI, percutaneous coronary intervention.

**Figure S1. Kaplan-Meier Event Curves at 10 Years and 3-Year Landmark Analysis for Clinical Outcomes.**

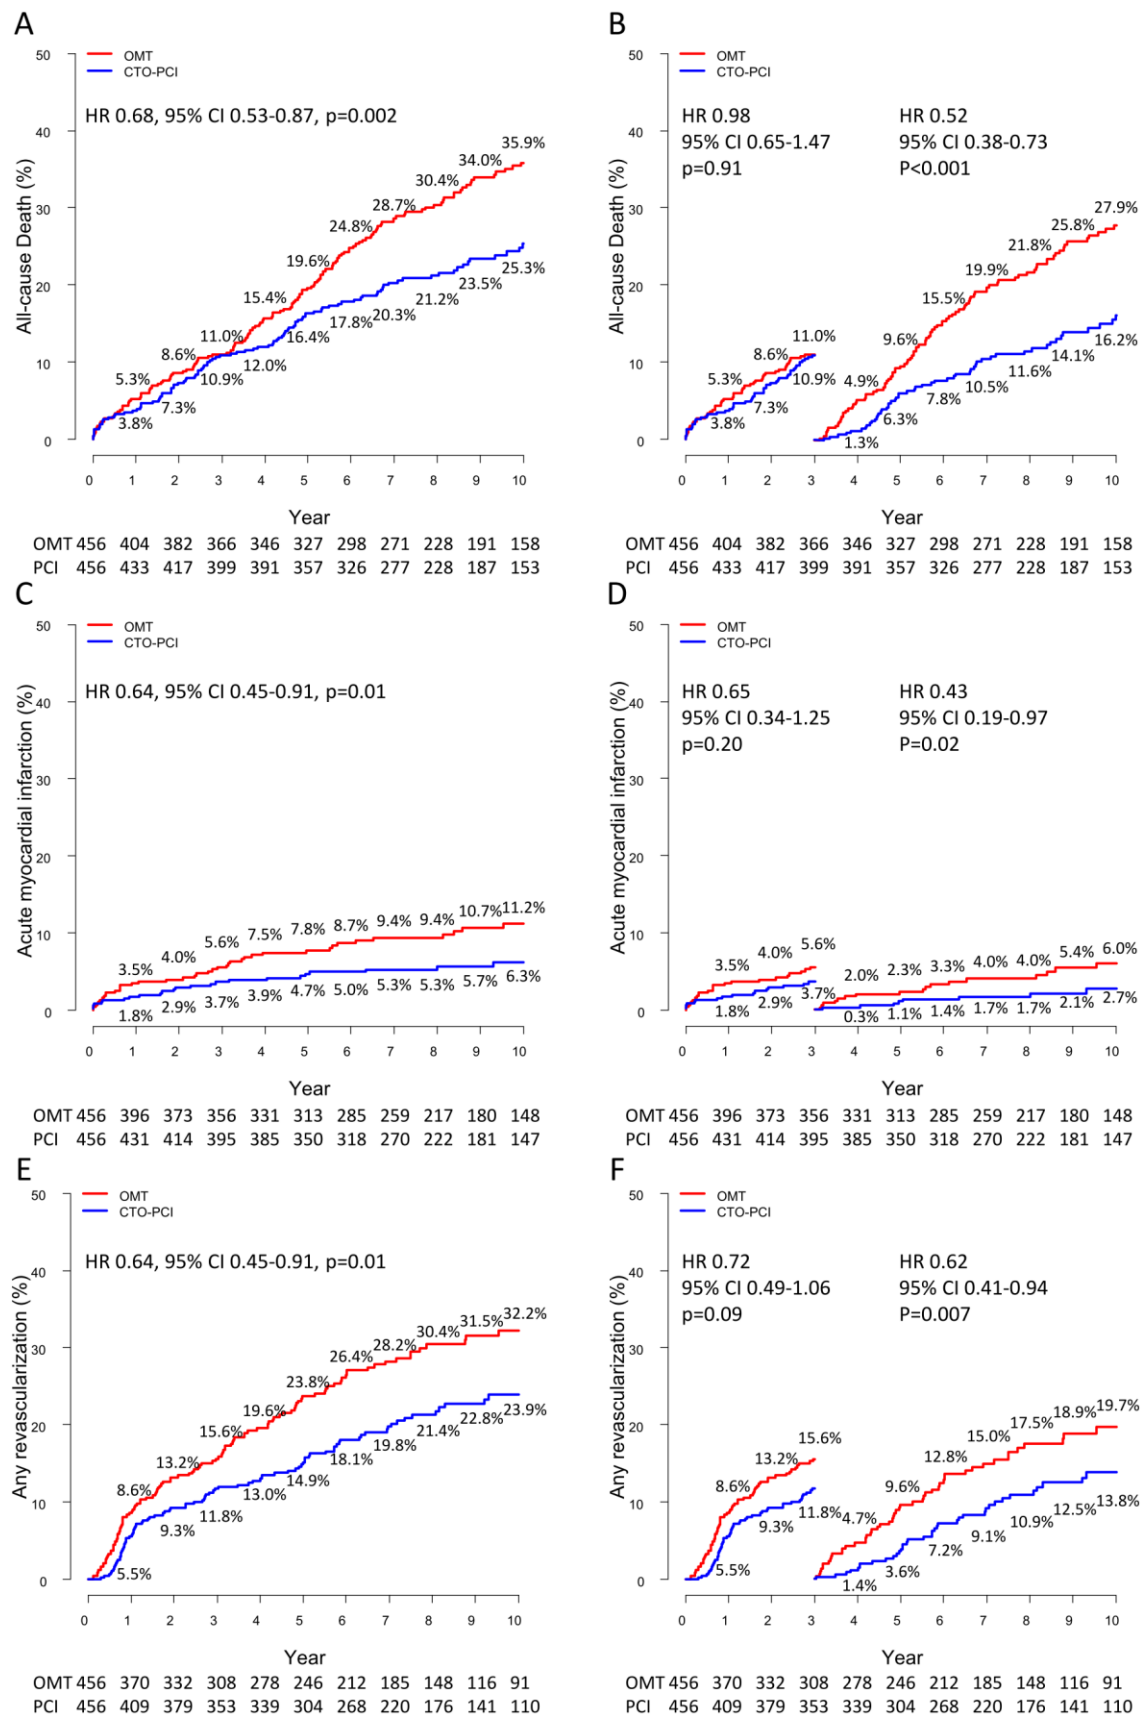

10-year cumulative event curves for (A) all-cause death, (C) acute myocardial infarction, and (E) any revascularization. Time-to-event curves with landmark analysis from 0 to 3 and 3 to 10 years for (B) all-cause death, (D) acute myocardial infarction, and (F) any revascularization. CI indicates confidence interval; CTO, chronic total occlusion; HR, hazard ratio; OMT, optimal medical therapy; and PCI, percutaneous coronary intervention.
